# Supplementary material
Source: publisher figshare collection journal article supplement (https://frontiersin.figshare.com/ndownloader/files/29128038)
Supplement: Supplementary file [file 29128038]

**Supplementary Figure 1.**

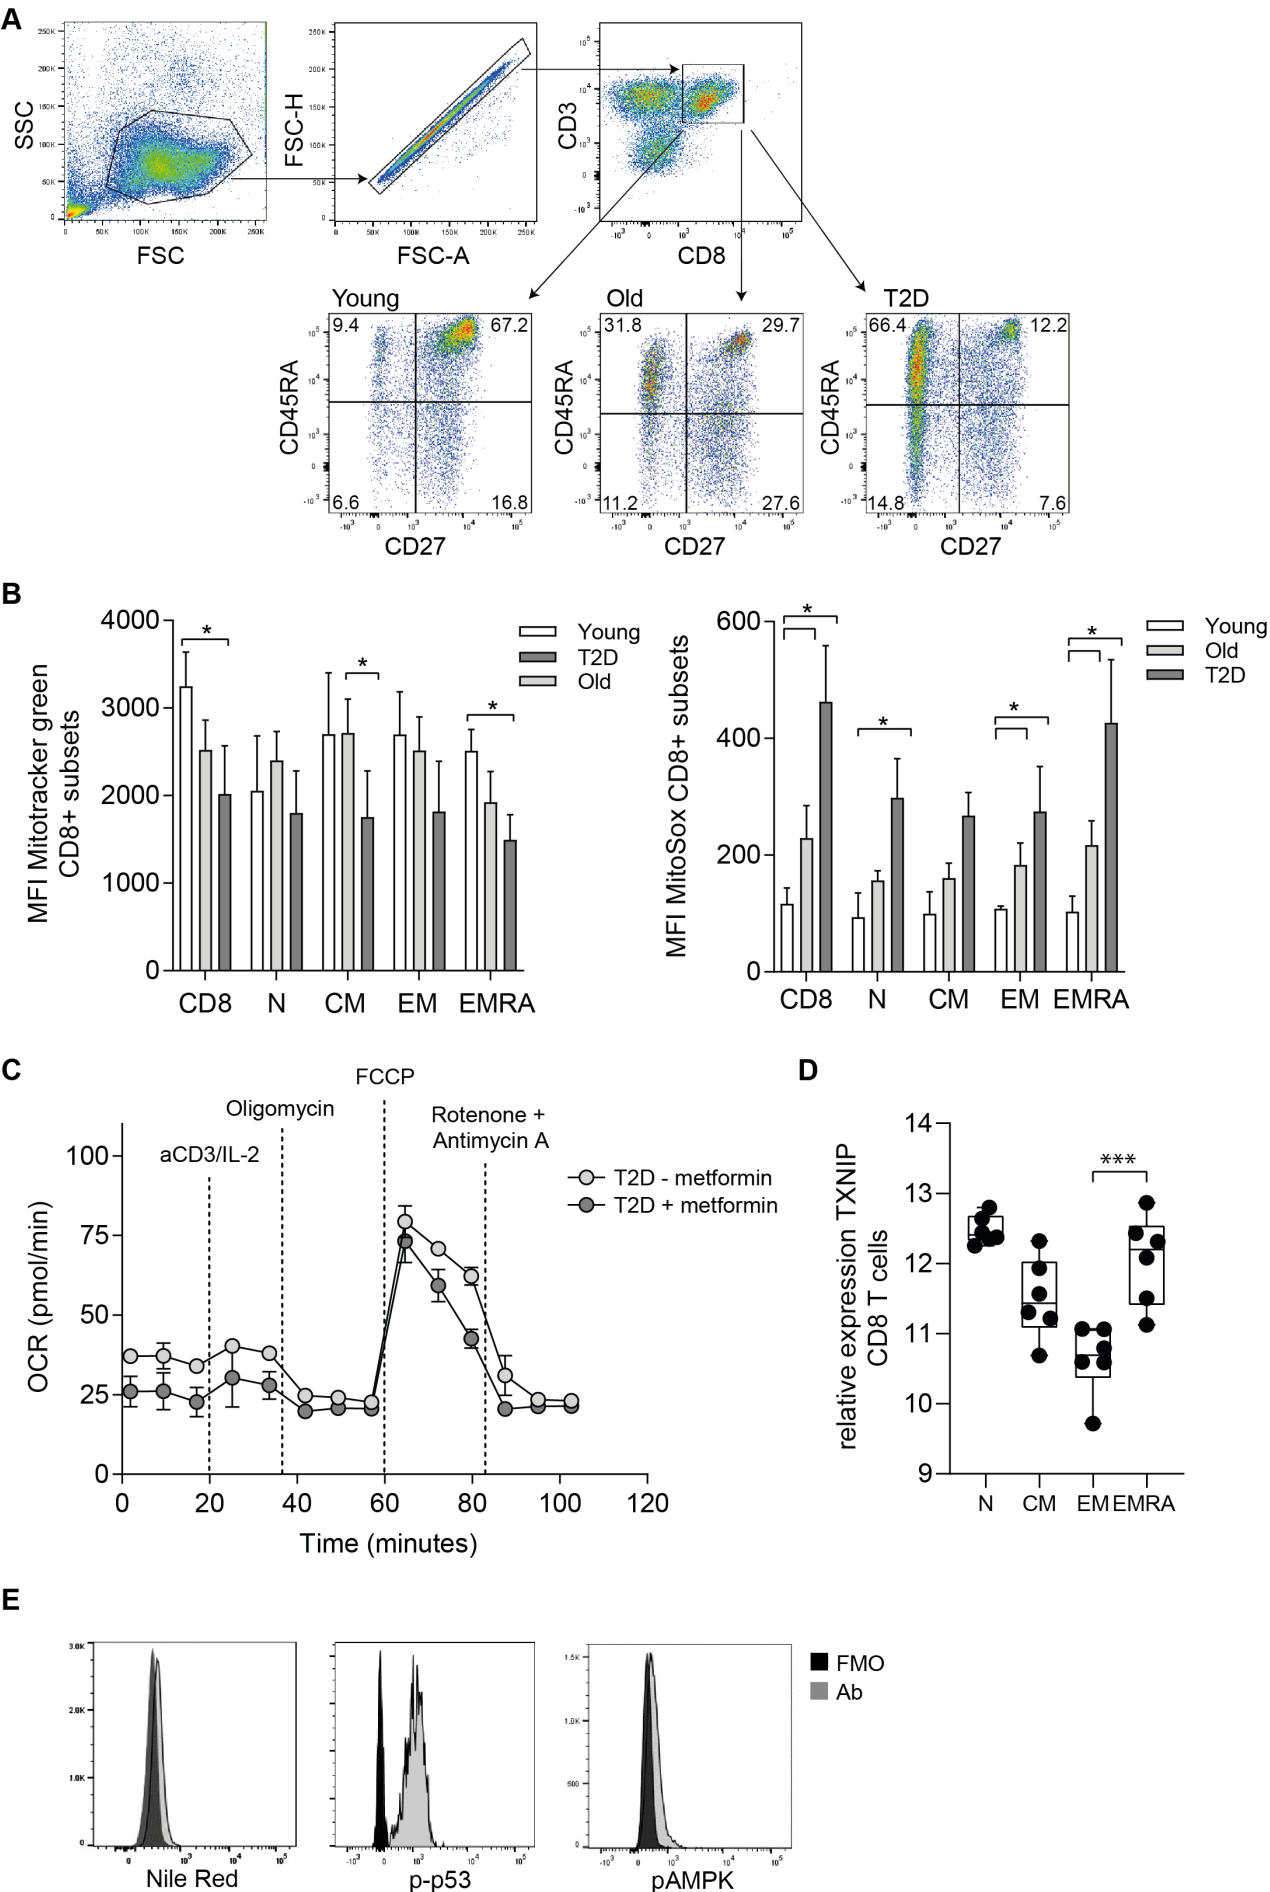

## Supplementary Figure 1. Phenotyping of CD8<sup>+</sup> EMRA T cells

(A) Gating strategy for CD27/CD45RA defined CD8<sup>+</sup> T cell subsets. From left to right, lymphocytes, single cells, CD3<sup>+</sup>CD8<sup>+</sup> T cells and CD27/CD45RA subsets from young, old and people living with T2D. (B) Quantification of Mitotracker green and MitoSOX in total CD8<sup>+</sup> T cells together with CD27/CD45RA defined CD8<sup>+</sup> T cell EMRAs isolated from young, older individuals and people living with T2D. Data expressed as mean  $\pm$  SEM, n = 7. (C) Oxygen consumption rates (OCR) of CD8<sup>+</sup> T cells from people living with T2D who received metformin compared to those who did not. (D) Relative expression of thioredoxin-interacting protein using the deposited data set GEO Series accession number GSE98640 from 6 old individuals. (E) Examples of Nile red, pAMPK and p-p53 staining with and without an FMO control used to set the positive and negative gate. P values were determined using a two-way ANOVA with Bonferroni analysis used for post-hoc testing,  $p^* = < 0.05$ .
